# Supplementary material for: Evidence-Based Community Health Worker Program Addresses Unmet Social Needs And Generates Positive Return On Investment
Source: Health Aff (Millwood). Author manuscript; Available in PMC 2021 Nov 3. (PMC8564553; doi:10.1377/hlthaff.2019.00981)
Supplement: Supplementary Material [file NIHMS1748829-supplement-Supplementary_Material.pdf]

Appendix 1: Infrastructure for an IMPaCT team

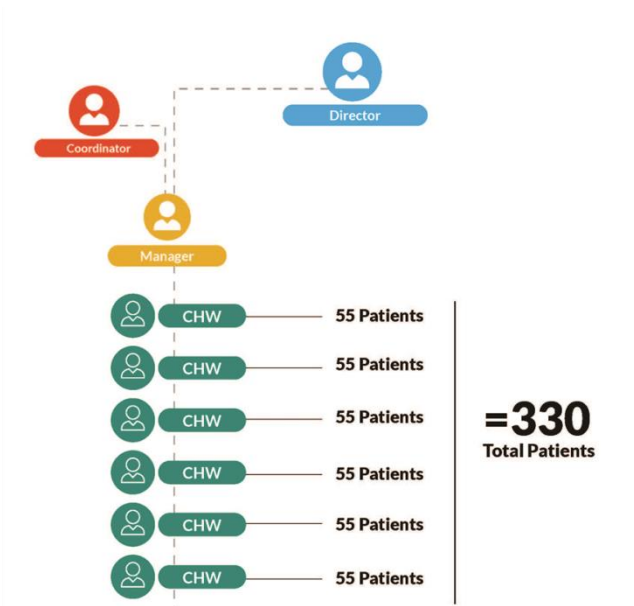

Appendix 1: Infrastructure for a CHW team. CHWs work in teams of six serving 330 patients annually. Teams are supervised by a manger (typically an MSW or MPH). A coordinator helps to identify and enroll patients, and collecting data for ongoing quality assurance. One coordinator can serve two manager-led teams. A high-level director supervises eight manager-led teams.

| Appendix 2: Sensitivity Analysis                  |             |                                                                                                   |                                                                                                   |
|---------------------------------------------------|-------------|---------------------------------------------------------------------------------------------------|---------------------------------------------------------------------------------------------------|
|                                                   | Base Case   | Best Case<br>(inpatient savings inflated by 25% and additional outpatient costs decreased by 25%) | Worst Case<br>(inpatient savings lowered by 25% and additional outpatient costs increased by 25%) |
| Inpatient Savings                                 | \$1,413,307 | \$1,766,633                                                                                       | \$1,059,980                                                                                       |
| Additional Outpatient Costs                       | \$11,999    | \$8,999                                                                                           | \$14,998                                                                                          |
|                                                   |             |                                                                                                   |                                                                                                   |
| Total Medicaid Savings Per Year                   | 1,401,308   | 1,757,634                                                                                         | 1,044,982                                                                                         |
|                                                   |             |                                                                                                   |                                                                                                   |
| ROI based on cost savings and expense calculation | 2.47        | 3.09                                                                                              | 1.84                                                                                              |

| <b>Appendix 3: Cost Calculation Using Bed Days</b>                           |                       |
|------------------------------------------------------------------------------|-----------------------|
|                                                                              |                       |
| <b>Assumptions</b>                                                           |                       |
| Estimated Total Medicaid Cost Per Bed Day (Facilities and Professional Fees) | \$2,738               |
| Number of Patients (Caseload for a CHW Team)                                 | 330                   |
|                                                                              |                       |
| <b>Inpatient Costs for Intervention Patients</b>                             |                       |
| Number of Bed-Days Per Patient-Year for Intervention Patients                | 1.85                  |
| Total Number of Bed-Days Per Team for Intervention Patients                  | 611.6                 |
| DRG Case-Mix Weight for Intervention Admissions                              | 0.92                  |
| Estimated Total (Facilities and Professional) Medicaid Cost Per Bed-Days     | \$2,738               |
| Case Mix Adjusted Cost for Control Intervention Bed-Days                     | \$2,518.69            |
| <b>Total Inpatient Costs for Intervention Patients</b>                       | <b>\$1,540,428.26</b> |
|                                                                              |                       |
| <b>Inpatient Cost for Control Patients</b>                                   |                       |
| Number of Bed-Days Per Patient-Year for Control Patients                     | 2.72                  |
| Total Number of Bed-Days Per Team for Control Patients                       | 898.82                |
| DRG Case-Mix Weight for Control Admissions                                   | 1.05                  |
| Estimated Total (Facilities and Professional) Medicaid Cost Per Bed-Days     | \$2,738               |
| Case Mix Adjusted Cost for Control Group Bed-Days                            | \$2,874.59            |
| <b>Total Inpatient Costs for Control Patients</b>                            | <b>\$2,583,724.27</b> |
|                                                                              |                       |
| <b>Inpatient Cost Savings</b>                                                | <b>\$1,043,296.01</b> |
|                                                                              |                       |
| <b>Outpatient Costs for Intervention Patients</b>                            |                       |
| Number of Outpatient Visits per Patient-Year for Intervention Patients       | 12                    |
| Total Number of Outpatient Visits Per Team for Intervention Patients         | 4026                  |
| Average Medicaid Cost Per Outpatient Visit                                   | \$45                  |
| <b>Total Outpatient Costs for Intervention Patients</b>                      | <b>\$182,981.70</b>   |
|                                                                              |                       |
| <b>Outpatient Costs for Control Patients</b>                                 |                       |
| Number of Outpatient Visits per Patient-Year for Control Patients            | 11                    |
| Total Number of Outpatient Visits Per Team for Control Patients              | 3762                  |
| Average Medicaid Cost Per Outpatient Visit                                   | \$45                  |
| <b>Total Outpatient Costs for Control Patients</b>                           | <b>\$170,982.90</b>   |
|                                                                              |                       |
| <b>Additional Outpatient Costs</b>                                           | <b>\$11,998.80</b>    |
|                                                                              |                       |
| <b>Total Estimated Medicaid Savings Per Year</b>                             | <b>\$1,031,297.21</b> |
| <b>Return on Investment (Total Savings Divided by Expenses Per Team)</b>     | <b>1.82</b>           |
| Source: Authors' Analysis                                                    |                       |
